# Supplementary material for: Ultrastructural Imaging of Activity-Dependent Synaptic Membrane-Trafficking Events in Cultured Brain Slices
Source: Neuron. 2020 Dec 9;108(5):843–860.e8. doi: 10.1016/j.neuron.2020.09.004 (PMC7736621; doi:10.1016/j.neuron.2020.09.004)
Supplement: Document S1. Figures S1–S7 [file mmc1.pdf]

**Supplemental Information**

**Ultrastructural Imaging of Activity-  
Dependent Synaptic Membrane-  
Trafficking Events in Cultured Brain Slices**

**Cordelia Imig, Francisco José López-Murcia, Lydia Maus, Inés Hojas García-Plaza, Lena Sünke Mortensen, Manuela Schwark, Valentin Schwarze, Julie Angibaud, U. Valentin Nägerl, Holger Taschenberger, Nils Brose, and Benjamin H. Cooper**

**Supplemental Information**

**Ultrastructural Imaging of Activity-  
Dependent Synaptic Membrane-  
Trafficking Events in Cultured Brain Slices**

**Cordelia Imig, Francisco José López-Murcia, Lydia Maus, Inés Hojas García-Plaza, Lena Sünke Mortensen, Manuela Schwark, Valentin Schwarze, Julie Angibaud, U. Valentin Nägerl, Holger Taschenberger, Nils Brose, and Benjamin H. Cooper**

**Figure S1**

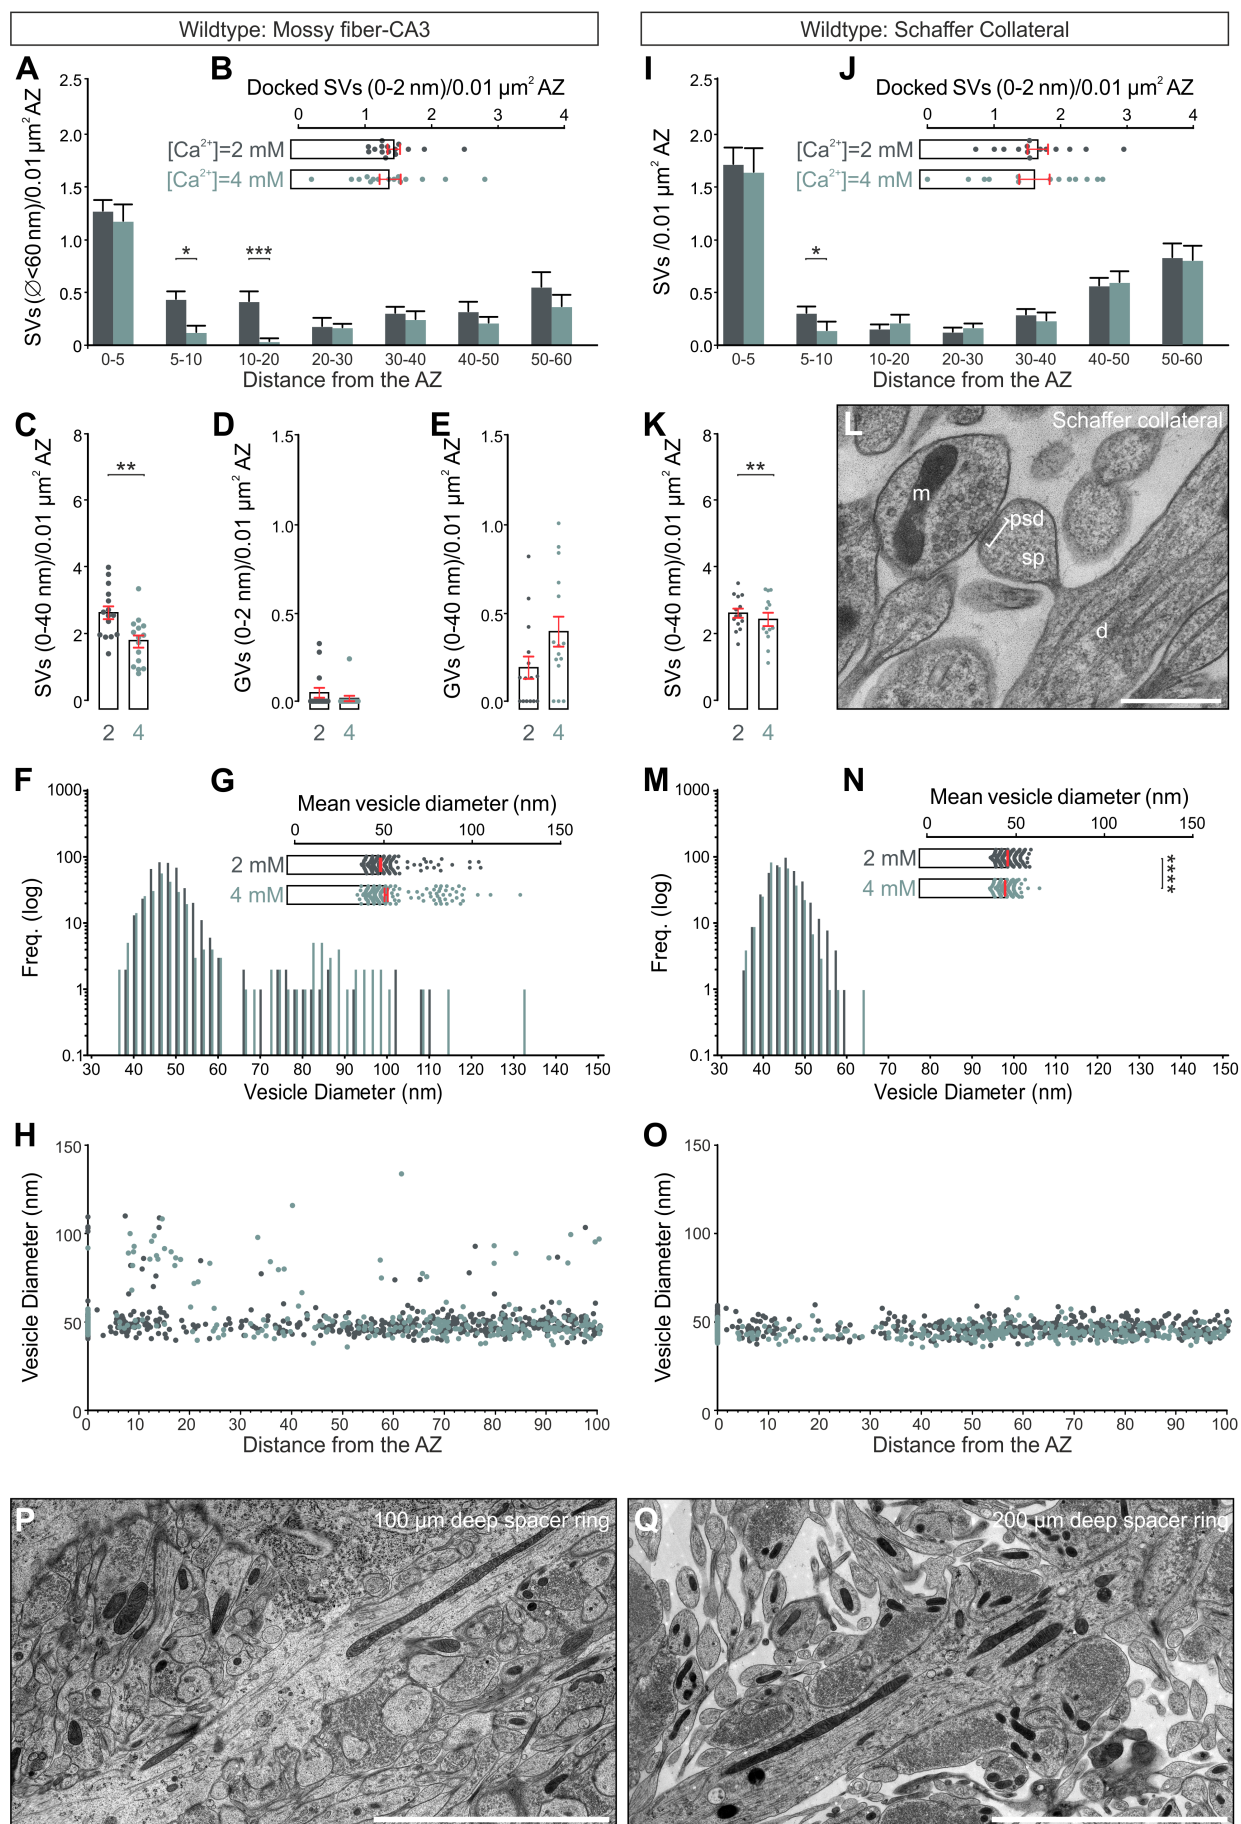

**Supplementary Figure 1.** Comparative ultrastructural analysis of wild-type mossy fiber-CA3 and Schaffer collateral synapses at different external  $\text{Ca}^{2+}$  concentrations and in the presence of 1  $\mu\text{M}$  TTX and glutamate receptor blockers in cultured hippocampal roller tube slices.

**A-H,** 3D Ultrastructural analysis of vesicle pools at active zones (AZs) of mossy fiber-CA3 synapses at 2 mM (dark grey) and 4 mM (green) external  $\text{Ca}^{2+}$ .

**I-O,** Ultrastructural analysis of vesicle pools at AZs of Schaffer collateral synapses at 2 mM (dark grey) and 4 mM (green) external  $\text{Ca}^{2+}$ .

**A, I,** Frequency distribution plotting the distribution of SVs ( $\varnothing < 60$  nm) within 60 nm of the AZ membrane normalized to AZ area.

**B, J,** Scatterplot indicating the spatial density of docked SVs (0-2 nm bin) normalized to reconstructed AZ area.

**C, K,** SV number within 0-40 nm of the AZ normalized to AZ area.

**D,** Spatial density of docked giant vesicles (GVs;  $\varnothing > 60$  nm) normalized to AZ area.

**E,** GV number within 0-40 nm of the AZ membrane normalized to AZ area.

**F, M,** Frequency distribution of vesicle diameters for undocked vesicles within 100 nm of the AZ membrane (2 nm bins). Mossy fiber-CA3 2mM  $\text{Ca}^{2+}$ , 420 vesicles; Mossy fiber-CA3 4mM  $\text{Ca}^{2+}$ , 273 vesicles; Schaffer collateral-CA1 2mM  $\text{Ca}^{2+}$ , 428 vesicles; Schaffer collateral-CA1 4mM  $\text{Ca}^{2+}$ , 338 vesicles.

**G, N,** Scatterplot indicating the mean diameter of docked vesicles. Mossy fiber-CA3 2mM  $\text{Ca}^{2+}$ , 112 vesicles; Mossy fiber-CA3 4mM  $\text{Ca}^{2+}$ , 76 vesicles; Schaffer collateral-CA1 2mM  $\text{Ca}^{2+}$ , 140 vesicles; Schaffer collateral-CA1 4mM  $\text{Ca}^{2+}$ , 109 vesicles.

**H, O,** Scatterplot indicating the spatial distribution of vesicles with respect to vesicle diameter.

**L,** Transmission electron micrograph of a Schaffer collateral synapse in the CA1 region of the hippocampus (d, dendrite; m, mitochondrion; psd, postsynaptic density; sp, spine).

**P, Q,** Electron micrographs acquired in CA3 *stratum lucidum* in which the effect of tissue compression can be appreciated in slices from the same culture prepared by high-pressure freezing using sapphire discs separated by spacer rings of 100  $\mu\text{m}$  (**P**) or 200  $\mu\text{m}$  (**Q**) depth.

Scale bar: **L**, 500 nm; **P** and **Q**, 5  $\mu\text{m}$ . Error bars indicate mean  $\pm$  SEM; \* $p < 0.05$ ; \*\* $p < 0.01$ ; \*\*\* $p < 0.001$ ; \*\*\*\* $p < 0.0001$ . Mossy fiber-CA3 2mM  $\text{Ca}^{2+}$ , 2 cultures, 2 slices,  $n=15$  AZs; Mossy fiber-CA3 4mM  $\text{Ca}^{2+}$ , 2 cultures, 2 slices,  $n=15$  AZs; Schaffer collateral-CA1 2mM  $\text{Ca}^{2+}$ , 2 cultures, 2 slices,  $n=14$  AZs; Schaffer collateral-CA1 4mM  $\text{Ca}^{2+}$ , 2 cultures, 2 slices,  $n=13$  AZs.

See also Table S1A and S1B and Figure 1.

**Figure S2**

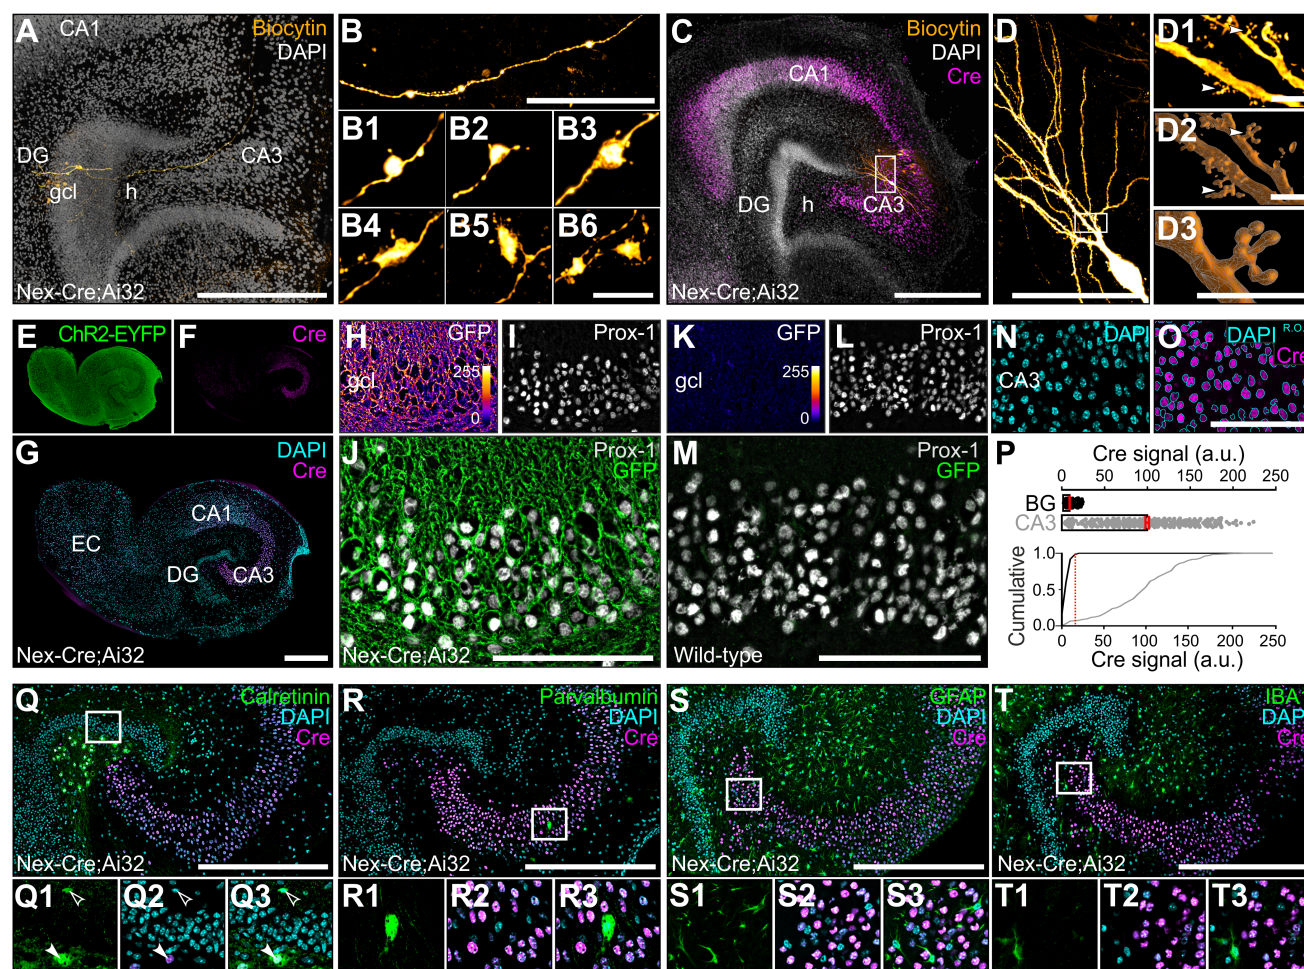

**Supplementary Figure 2.** Light microscopic analysis of pre- and postsynaptic development of the mossy fiber-CA3 synapse and ChR2 expression in cultured Nex-Cre;Ai32 slices. Related to Figure 1.

**A,** Maximum projection confocal stack in which post-hoc labelling of an electrophysiologically characterized and biocytin-filled granule cell, reveals the extent of its mossy fiber axonal projection throughout CA3 *stratum lucidum* (orange). Relative positions of dentate gyrus (DG) *stratum granulosum* and CA3 *stratum pyramidale* are shown by nuclear DAPI co-labelling (grey).

**B,** High magnification confocal z-stacks acquired in *stratum lucidum* reveal large and small *en passant* axonal varicosities (**B**). Large mossy fiber boutons (**B1-B6**) exhibit *in vivo*-like complexity, including fine filopodial extensions.

**C, D,** Maximum projection confocal stack of a post-hoc immunolabelling of an electrophysiologically characterized and biocytin-filled CA3 pyramidal neuron co-labelled for Cre-recombinase (magenta) and DAPI (grey). In *stratum lucidum*, proximal dendrites of the biocytin-filled cell (**D**, white box enlarged in **D1**) are decorated by complex, multi-compartmental spines (white arrowheads) as visualized in 3D reconstructions (**D2** and **D3**).

**E-G,** Immunohistochemical labelling against GFP detecting ChR2-EYFP (**E**, green), nuclear Cre-recombinase (**F, G**, magenta) and DAPI (**G**, cyan) in a Nex-Cre;Ai32 cultured slice. Nuclear Cre-recombinase signal is restricted to the *stratum pramidale*.

**H-M,** Comparative immunohistochemical analysis of membrane-targeted ChR2-EYFP signal (**H, K**, 'fire LUT) distribution within Prox-1 labelled (**I, L**, grey) granule cells of the denate gyrus in Nex-Cre;Ai32 (**H-J**) and wild-type (**K-M**) organotypic slices. In line with earlier findings (Goebbels et al., 2006), granule cells (GCs) of the Nex-Cre knock-in mouse line only transiently express Cre-recombinase and therefore exhibit robust ChR2-EYFP fusion protein expression (**B**), but lack Cre-recombinase immunoreactivity.

**N-P,** In the CA3 pyramidal cell layer, the vast majority of DAPI stained nuclei (**N**, cyan; **O**, cyan outline) are immunoreactive for Cre-recombinase (**O**, magenta). Scatterplot (**P**, upper) and cumulative distribution (**P**, lower) representing the quantification of nuclear Cre-recombinase signal intensity in non-principal cells (BG, 'background signal') and CA3 pyramidal cells (CA3; 'real signal') in Nex-Cre;Ai32 slice cultures.

Approximately 93.7% of all CA3 pyramidal cell nuclei have above-threshold (red dashed line) Cre-recombinase expression (**P**, BG, n = 5 slices; 9.3 a.u.  $\pm$  1.29; CA3, n = 5; 99.3 a.u.  $\pm$  2.34). **Q-**

**T,** Cre-recombinase labelling (magenta) colocalizes with DAPI-positive nuclei (cyan) in calretinin-positive hilar mossy cells (**Q, Q1-Q3**, green, white arrowhead), but is not detectable in

calretinin-positive interneurons (**Q**, **Q1-Q3**, green, open arrowhead) in the molecular layer of the dentate gyrus, parvalbumin-positive interneurons (**R**, **R1-R3**, green), GFAP-positive astrocytes (**S**, **S1-S3**, green), or in IBA1-positive microglia (**T**, **T1-T3**, green).

Abbrev.: EC, entorhinal cortex; DG, dentate gyrus; CA3, *Cornu Ammonis* Area 3; CA1, *Cornu Ammonis* Area 1; gcl, granule cell layer). Scale bars: **A**, **C**, **G**, **Q-T**, 500  $\mu\text{m}$ ; **B**, **D**, **J**, **M**, **O**, 100  $\mu\text{m}$ ; **B6**, 10  $\mu\text{m}$ ; **D1**, 5  $\mu\text{m}$ ; **D2**, **D3**, 2 $\mu\text{m}$ . Error bars indicate mean  $\pm$  SEM.

**Figure S3**

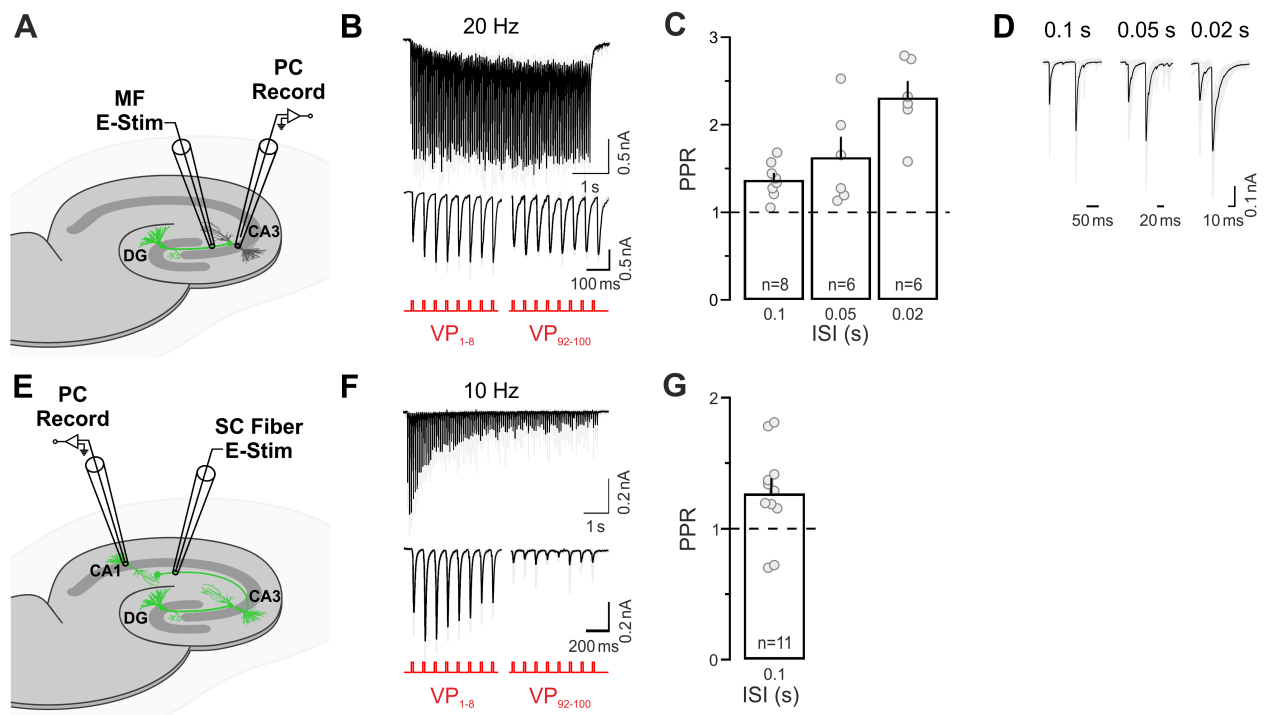

**Supplementary Figure 3.** Electrophysiological characterization of postsynaptic responses elicited by fiber stimulation of mossy fiber and Schaffer collateral axonal pathways in Dock10-Cre;Ai32 and Nex-Cre;Ai32 organotypic slices, respectively, via glass electrodes filled with external solution. Related to Figure 2.

**A,** Schematic of the experimental set-up for recording postsynaptic CA3 pyramidal cell (PC) responses to electrical fiber stimulation of the mossy fiber pathway (**B-D**).

**B,** Excitatory postsynaptic currents (EPSCs) recorded in response to 100 voltage pulses (VPs; 100  $\mu$ s duration, 4 to 7 V; 20Hz) in 2 mM  $\text{Ca}^{2+}$ . Responses to the initial (lower left) and final (lower right) eight stimuli in the train are shown in the bottom panels with an expanded timescale.

**C,** Paired-pulse ratios measured for different inter-stimulus intervals (ISI) of 0.1 ( $1.37 \pm 0.07$ , n= 8), 0.05 ( $1.63 \pm 0.22$ , n= 6), and 0.02 ( $2.31 \pm 0.18$ , n= 6) seconds.

**D,** Example traces of EPSCs recorded in response to paired pulses delivered with different inter-stimulus interval (ISI) of 0.1 or 0.05 and 0.02 seconds

**E,** Schematic of the experimental set-up for recording postsynaptic CA1 pyramidal cell (PC) responses to electrical fiber stimulation of the Schaffer collateral pathway (**F-G**).

**F,** EPSCs recorded in response to 100 VPs (10Hz) in 2 mM  $\text{Ca}^{2+}$ . Responses to the initial (lower left) and final (lower right) eight stimuli in the train are shown in the bottom panels at an expanded timescale.

**G,** Paired-pulse ratios measured for an interstimulus interval (ISI) of 0.1 second (PPR  $1.27 \pm 0.10$ , n= 11).

Error bars indicate mean  $\pm$  SEM.

**Figure S4**

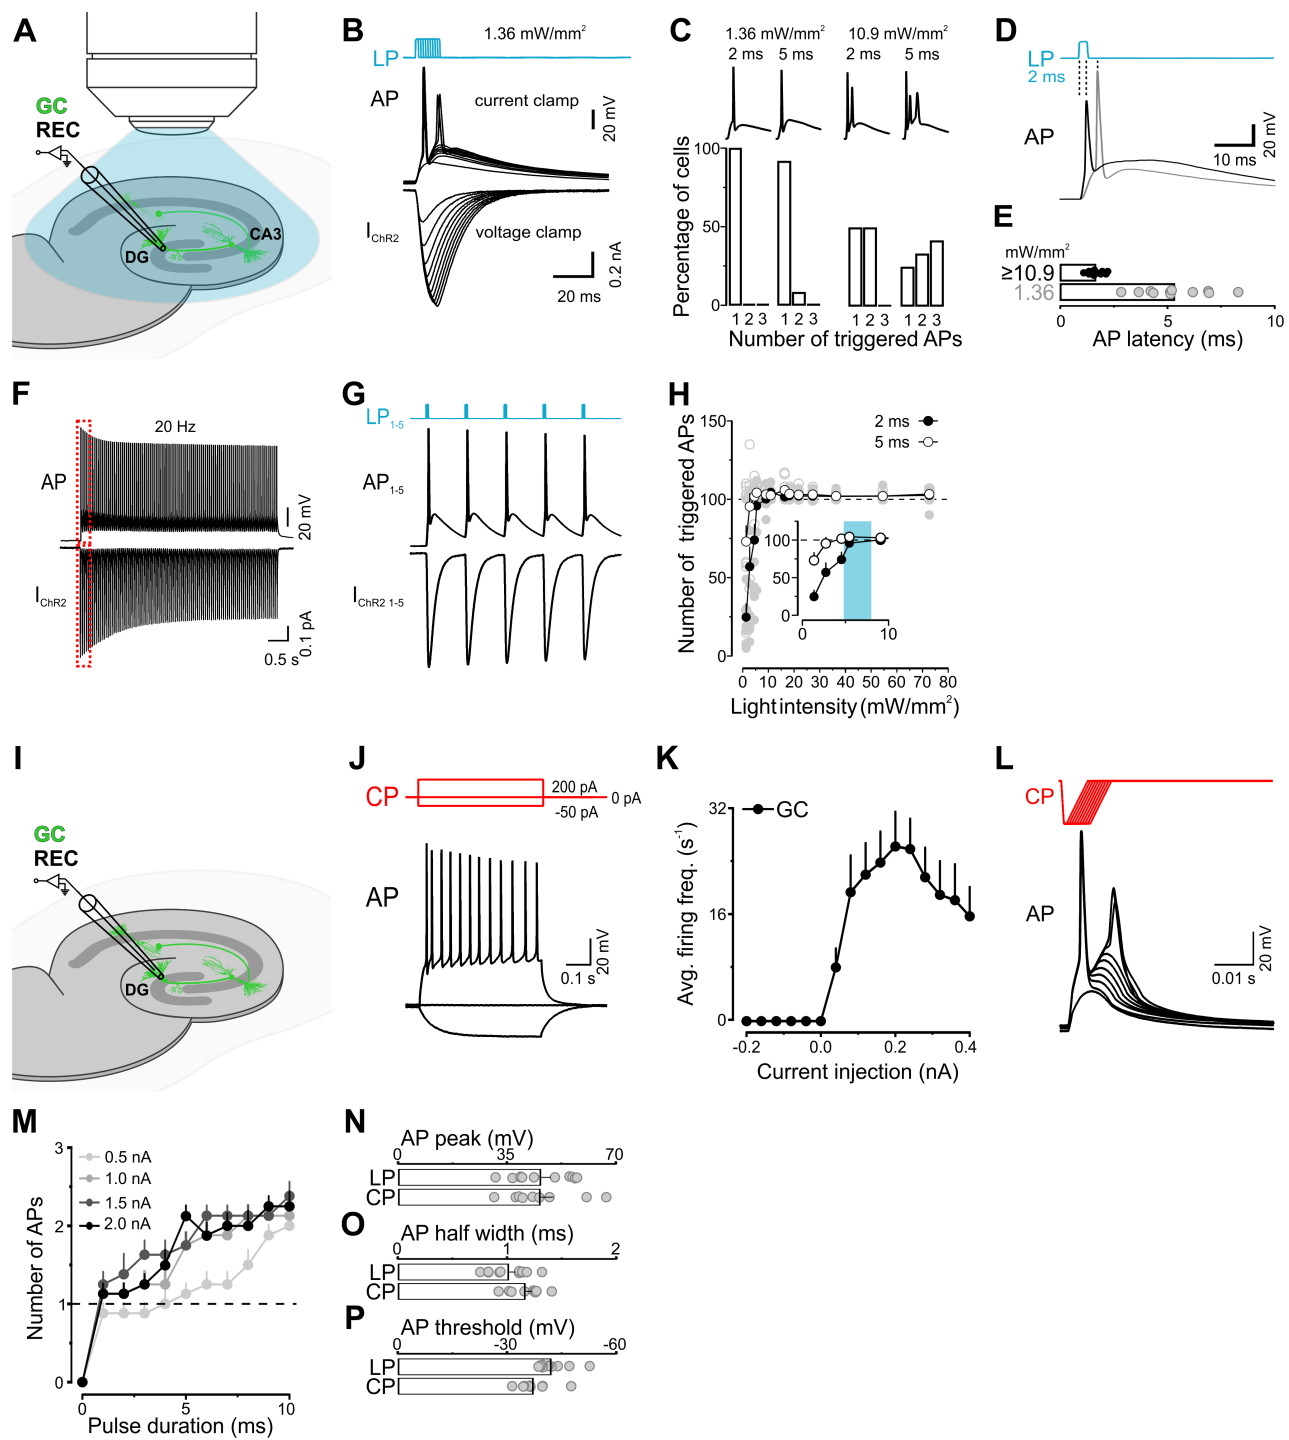

**Supplementary Figure 4.** Comparative electrophysiological analysis of the properties of optically and electrically elicited action potentials in dentate gyrus granule cells in Nex-Cre;Ai32 organotypic slices. Related to Figure 2.

**A**, Schematic illustrating experimental configuration for analyzing AP firing properties of dentate gyrus (DG) granule cells in cultured Nex-Cre;Ai32 slices in response to light stimuli (**B-H**).

**B**, Exemplary recording of action potentials (APs) in ChR2-expressing hippocampal DG granule cells (GCs) in response to blue light (470 nm) pulses (LPs). For a given light intensity, increasing LP duration (1-10 ms) triggered zero to two APs (upper panel) and a ChR2-mediated current ( $I_{ChR2}$ ) of increasing size and duration (bottom panel) in this GC.

**C**, Summary data on AP firing in response to LPs of either 2 ms or 5 ms duration for two light intensities (1.36 mW/mm<sup>2</sup> and 10.9 mW/mm<sup>2</sup> (n= 12 cells).

**D, E**, AP waveform (**D**) and latency (**E**) measured in response to a single 2 ms LP at two light intensities (1.36 mW/mm<sup>2</sup>,  $5.35 \pm 0.49$  ms, n= 11 cells; and  $\geq 10.9$  mW/mm<sup>2</sup>,  $1.67 \pm 0.08$  ms, n= 11 cells). Latencies are measured from the onset of the light stimulus.

**F, G**, AP discharge pattern recorded in response to 20 Hz LP trains of 5s duration (100 stimuli) (**F**). All GCs that were excitable by light intensities achievable in the high-pressure freezing chamber were also capable of faithfully following 20 Hz stimulation for at least 100 APs for a large range of light intensities. Traces exemplify an AP train recorded in current-clamp mode (upper panel) and  $I_{ChR2}$  recorded in voltage-clamp mode (lower panel) obtained in the same cell in response to 100 LPs (20 Hz, 2 ms pulse duration, light intensities of 5.45 mW/mm<sup>2</sup> and 1.36 mW/mm<sup>2</sup> for current-clamp and voltage-clamp, respectively). Note the strong inactivation of  $I_{ChR2}$  during the 5 s 20 Hz train. The initial five responses during the trains (**G**, indicated by the red dashed boxes in **F**) are shown at an expanded time scale.

**H**, Total number of APs triggered in GCs by 100 LP trains (20 Hz) for different light intensities and LP durations (2 ms, n= 11 cells or 5 ms, n= 10 cells). For light intensities  $>5$  mW/mm<sup>2</sup>, an equally high reliability of AP firing was observed in response to trains of 100 LPs of either 2 ms or 5 ms duration. For low light intensities ( $<5$  mW/mm<sup>2</sup>), 5 ms LP trains yielded a larger total count of APs.

**I**, Schematic illustrating experimental configuration for measuring AP firing properties in response to injection of depolarizing current pulses (CP) into GCs of cultured Nex-Cre;Ai32 slices (**J-P**).

**J**, Passive membrane properties and AP firing pattern in response to CP injections of ChR2-expressing hippocampal GCs were characterized under current-clamp conditions by applying families of CPs (500 ms duration, -50 pA initial amplitude, incremented in 50 pA steps).

**K**, GCs exhibited sustained AP-firing when injecting depolarizing CPs and had a maximum firing frequency of  $\sim 25 \text{ s}^{-1}$  (n= 10 cells).

**L**, AP firing of ChR2-expressing GCs in response to depolarizing CP injections. CPs were composed of two ramps (1 ms rise, 8 ms decay) separated by a plateau of variable duration (1 - 10 ms) to mimic the shape of the ChR2-mediated current ( $I_{\text{ChR2}}$ ) observed under whole-cell voltage-clamp in response to light stimulation (see Figure **S4B**).

**M**, Depolarizing CP injections of increasing duration and increasing amplitude (0.5 – 2 nA) triggered zero to three APs (n= 8 cells each).

**N-P**, Comparison of the properties of APs recorded in response to either stimulation by LPs or CP injections. Similar mean values were obtained for both modes of stimulation [**N**, AP peak amplitude:  $46.05 \pm 2.84 \text{ mV}$  (LP, n= 11),  $45.82 \pm 3.81 \text{ mV}$  (CP, n= 9); **O**, AP half width:  $1.02 \pm 0.05 \text{ ms}$  (LP, n= 11),  $1.17 \pm 0.05 \text{ ms}$  (CP, n= 9); **P**, AP threshold:  $-42.26 \pm 1.26 \text{ mV}$  (LP, n=11),  $-37.34 \pm 1.55 \text{ mV}$  (CP, n= 9)].

Error bars indicate mean  $\pm$  SEM.

**Figure S5**

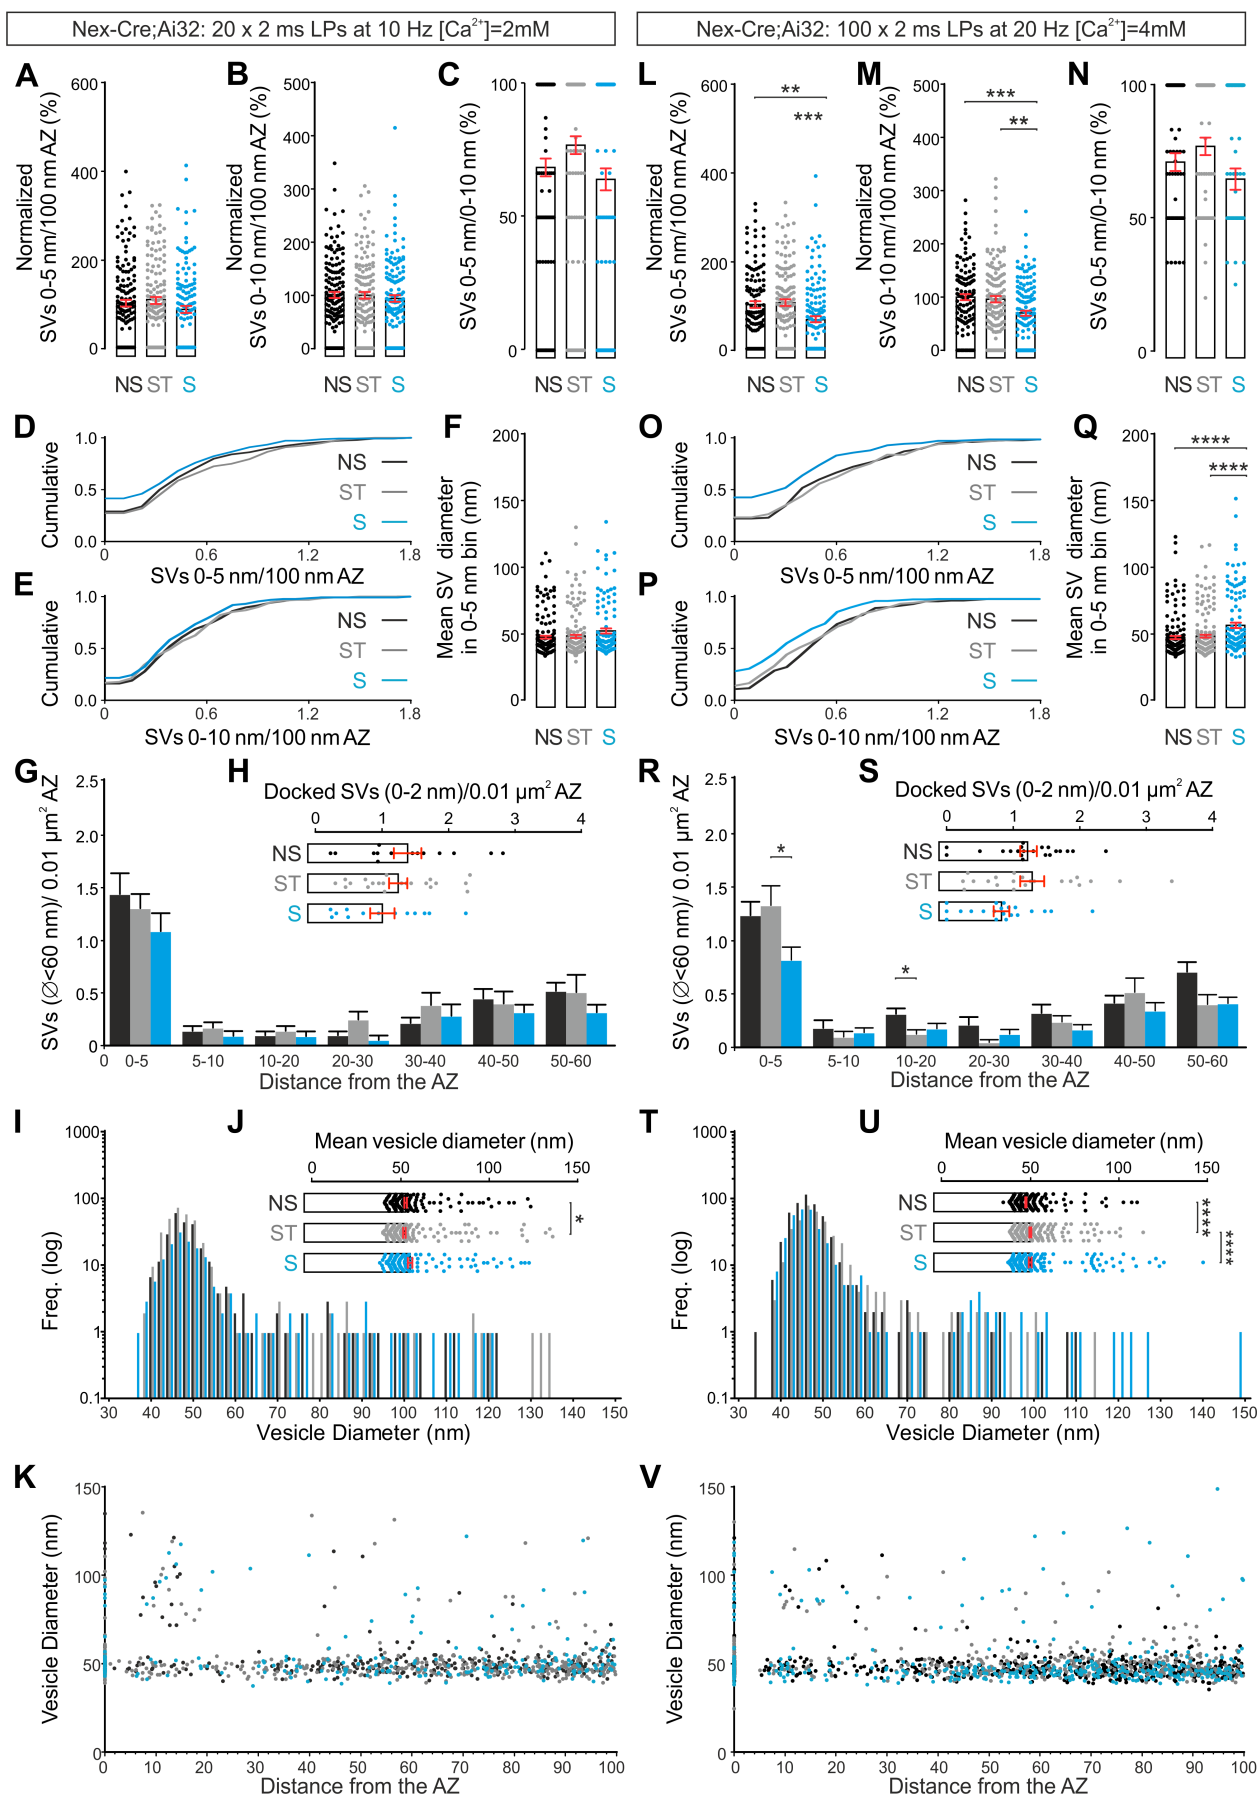

**Supplementary Figure 5.** Comparative 2D and 3D ultrastructural analyses of mossy fiber-CA3 synapses frozen immediately after mild (20 x 2 ms LPs at 10 Hz; 2 mM  $\text{Ca}^{2+}$ ) or strong (100 x 2 ms LPs at 20 Hz; 4 mM  $\text{Ca}^{2+}$ ) from cultured Nex-Cre;Ai32 slices.

**A-K**, 2D (**A-F**) and 3D (**G-K**) ultrastructural analyses of vesicle pools at active zones (AZs) of mossy fiber-CA3 synapses after mild stimulation. NS, no stimulation (black); ST, light stimulation + 1  $\mu\text{M}$  TTX (grey); and S, light stimulation (blue).

**A, B**, Spatial density of membrane-proximal vesicles per 100 nm AZ length for vesicles within 0-5 nm (**A**) and 0-10 nm (**B**) of the AZ. Values are normalized to the no stimulation (NS) control condition.

**C**, Relative proportion of all vesicles within 0-10 nm of the AZ localized within in the 0-5 nm bin.

**D, E**, Cumulative frequency plots indicating the spatial distribution of membrane-proximal vesicles per 100 nm AZ length for vesicles within 0-5 nm (**D**) and 0-10 nm (**E**) of the membrane.

**F**, Mean diameter of vesicles within 0-5 nm of the AZ. NS, 181 vesicles; ST, 173 vesicles; S, 118 vesicles.

**G**, Frequency distributions plotting the distribution of SVs ( $\varnothing < 60$  nm) within 60 nm of the AZ membrane normalized to AZ area.

**H**, Spatial density of docked SVs (0-2 nm bin) normalized to reconstructed AZ area.

**I**, Frequency distributions of for undocked vesicles within 100 nm of the AZ membrane (2 nm bins). NS, 273 vesicles; ST, 358 vesicles; S, 175 vesicles.

**J**, Mean diameter of docked (0-2 nm) vesicles. NS, 95 vesicles; ST, 100 vesicles; S, 55 vesicles.

**K**, Spatial distribution of vesicles with respect to vesicle diameter.

**L-V**, 2D (**L-Q**) and 3D (**R-V**) ultrastructural analyses of vesicle pools at AZs of mossy fiber-CA3 synapses after strong stimulation.

**L, M**, Spatial density of membrane-proximal vesicles per 100 nm AZ length for vesicles within 0-5 nm (**L**) and 0-10 nm (**M**) of the AZ. Values are normalized to the no stimulation (NS) control condition.

**N**, Relative proportion of all vesicles within 0-10 nm of the AZ localized within in the 0-5 nm bin.

**O, P**, Cumulative frequency plots indicating the spatial distribution of membrane-proximal vesicles per 100 nm AZ length for vesicles within 0-5 nm (**O**) and 0-10 nm (**P**) of the membrane.

**Q**, Mean diameter of vesicles within 0-5 nm of the AZ. NS, 180 vesicles; ST, 197 vesicles; S, 129 vesicles.

**R**, Frequency distributions plotting the distribution of SVs ( $\varnothing < 60$  nm) within 60 nm of the AZ membrane normalized to AZ area.

**S**, Spatial density of docked SVs (0-2 nm bin) normalized to reconstructed AZ area.

**T**, Frequency distributions of for undocked vesicles within 100 nm of the AZ membrane (2 nm bins). NS, 483 vesicles; ST, 375 vesicles; S, 336 vesicles.

**U**, Mean diameter of docked (0-2 nm) vesicles. NS, 107 vesicles; ST, 134 vesicles; S, 88 vesicles.

**V**, Spatial distribution of vesicles with respect to vesicle diameter.

2D Analysis (**A-F**): NS, 3 cultures, 4 slices, 44 MFBs, n=144 AZs; ST, 3 cultures, 4 slices, 39 MFBs, n=131 AZs; S, 2 cultures, 3 slices, 36 MFBs, n= 135 AZs.

3D Analysis (**G-K**): NS, 2 cultures, 3 slices, 14 AZs; ST, 2 cultures, 3 slices, n=21 AZs; S, 1 culture, 2 slices, n= 13 AZs.

2D Analysis (**L-Q**): NS, 2 cultures, 2 slices, 38 MFBs, n=120 AZs; ST, 2 cultures, 2 slices, 42 MFBs, n=127 AZs; S, 2 cultures, 2 slices, 44 MFBs, n= 139 AZs.

3D Analysis (**R-V**): NS, 2 cultures, 2 slices, n=21 AZs; ST, 2 cultures, 2 slices, n=21 AZs; S, 2 cultures, 2 slices, n= 21 AZs.

Error bars indicate mean  $\pm$  SEM; \*p < 0.05; \*\*p < 0.01; \*\*\*p<0.001; \*\*\*\*p < 0.0001.

See also Figures 4 and 5 and Table S1G-S1J.

**Figure S6**

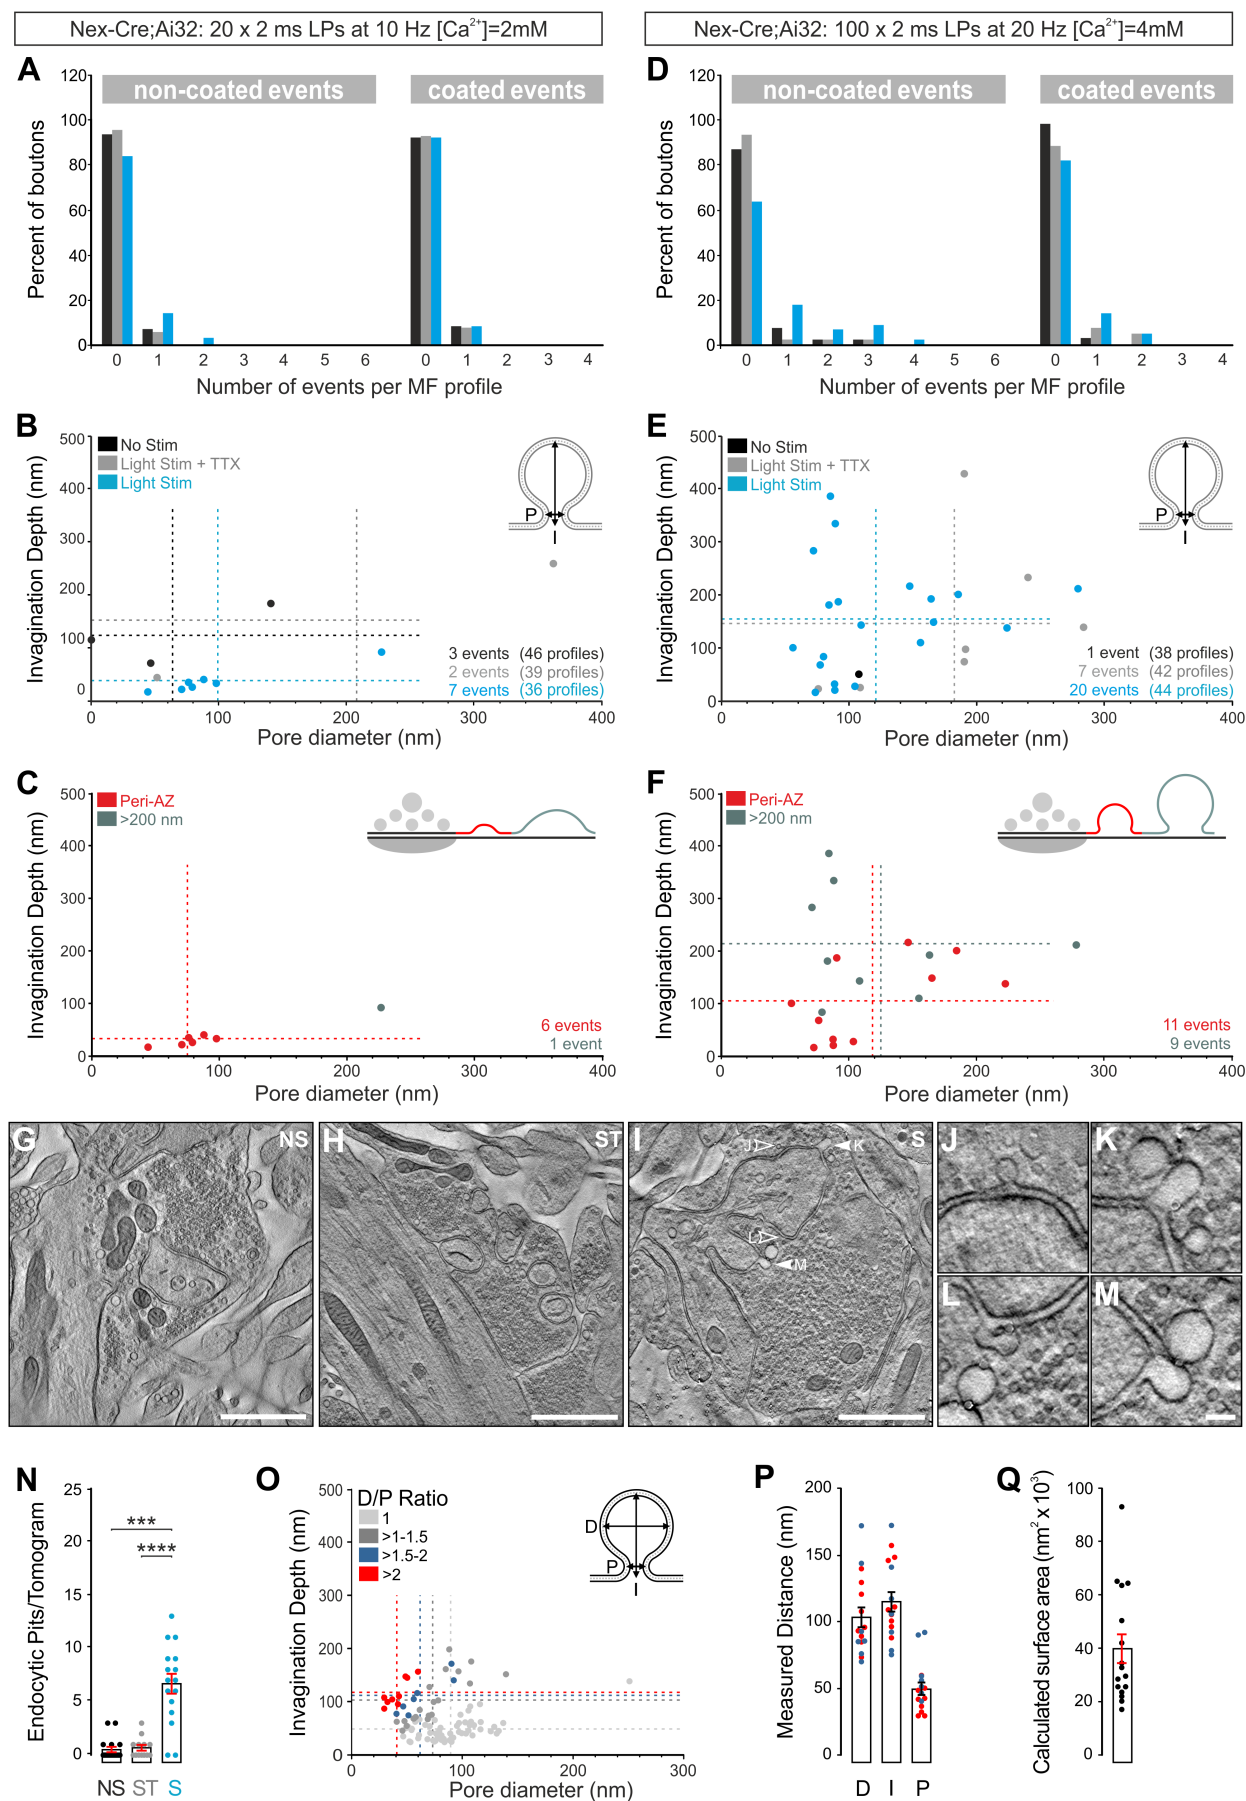

**Supplementary Figure 6.** Comparative 2D and 3D ultrastructural analyses of endocytic profiles in mossy fiber-CA3 synapses frozen immediately after mild (20 x 2 ms LPs at 10 Hz; 2 mM  $\text{Ca}^{2+}$ ) or strong (100 x 2 ms LPs at 20 Hz; 4 mM  $\text{Ca}^{2+}$ ) from cultured Nex-Cre;Ai32 slices.

**A-C**, 2D ultrastructural analyses of endocytic profiles in mossy fiber-CA3 synapses after mild stimulation. NS, no stimulation (black); ST, light stimulation + 1  $\mu\text{M}$  TTX (grey); and S, light stimulation (blue).

**D-F**, 2D ultrastructural analyses of endocytic profiles in mossy fiber-CA3 synapses after strong stimulation.

**A, D**, Histogram plotting the relative incidence of coated and non-coated membrane invaginations observed in the three experimental conditions: NS, no stimulation (black); ST, light stimulation in the presence of 1  $\mu\text{M}$  TTX (grey); and S, light stimulation (blue).

**B-F**, Relationship between pore diameter (P) and invagination depth (I) for non-coated endocytic intermediates across all conditions (**B, E**) and for non-coated endocytic intermediates detected exclusively in stimulated mossy fiber boutons at peri-active zonal (red) and more distally localized (green) sites (**C, F**). Dashed lines indicate respective mean values.

**G-Q**, 3D ultrastructural analyses of endocytic profiles in mossy fiber-CA3 synapses after strong stimulation.

**G-I**, Representative electron tomographic subvolumes acquired at 5000x magnification from 350 nm-thick sections through MFBs from three experimental conditions: NS, no stimulation (**G**), ST, stimulation in the presence of 1  $\mu\text{M}$  TTX (**H**), and S, stimulation (**I**).

**J-M**, Manipulation of tomographic slice tilt angles revealed the shape and full extent of individual membrane invaginations indicated in **I**.

**N**, Relative incidence of putative endocytic profiles per tomogram.

**O**, Relationship between pore diameter (P) and invagination depth (I) according to the ratio of maximum diameter (D) and pore diameter (D/P= 1, light grey; D/P= >1-1.5, dark grey; D/P= 1.5-2, blue; D/P= >2, red; respective mean values indicated by dashed lines).

**P**, Scatterplot indicating parameters (D, maximum diameter; I, invagination depth; P, pore diameter) pooled from endocytic events with D/P ratios of 1.5-2 (blue) and >2 (red) for pore diameters < 100 nm.

**Q**, Calculated surface area of predicted endocytosed vesicles from profiles with D/P ratios >1.5.

Scale bars: **G-I**, 1  $\mu\text{m}$ ; **M**, 100 nm. Error bars indicate mean  $\pm$  SEM; \*\*\* $p < 0.001$ ; \*\*\*\* $p < 0.0001$ .

2D Analysis (**A-C**): NS, 3 cultures, 4 slices, 47 MFBs; ST, 3 cultures, 4 slices, 39 MFBs; S, 2 cultures, 3 slices, 36 MFBs.

2D Analysis (**D-F**): NS, 3 cultures, 4 slices, 38 MFBs; ST, 3 cultures, 4 slices, 42 MFBs; S, 2 cultures, 3 slices, 36 MFBs.

3D Analysis (**G-Q**): NS, 2 cultures, 2 slices,  $n=17$  tomograms; ST, 2 cultures, 2 slices,  $n=13$  tomograms; S, 2 cultures, 2 slices,  $n=16$  tomograms.

See also Figures 6 and 7, Table S1K-S1M and Video S2.

**Figure S7**

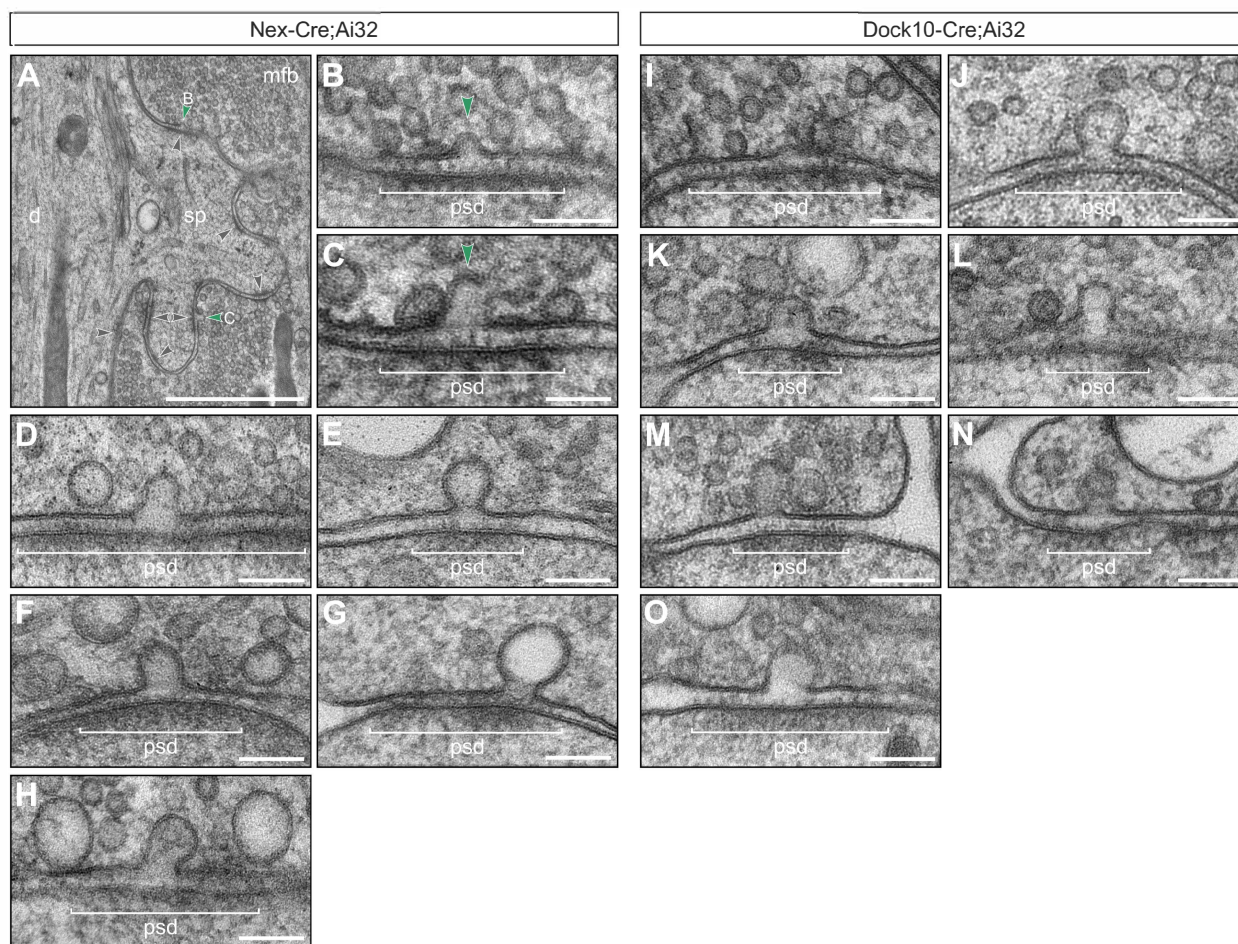

**Supplementary Figure 7.** Omega-profiles detected directly at mossy fiber presynaptic active zones in optically stimulated Nex-Cre;Ai32 and Dock10;Ai32 slices.

**A-C**, Active zone (AZ) localized omega profiles (green arrowheads) observed in direct apposition to the postsynaptic density (**A**, black arrowheads; **B-C**, psd) in stimulated Nex-Cre;Ai32 slices (20x 2 ms LPs at 10 Hz; 2 mM  $\text{Ca}^{2+}$ ).

**D-H**, AZ localized omega profiles observed in direct apposition to the postsynaptic density (psd) in stimulated Nex-Cre;Ai32 slices (100 x 2 ms LPs at 20 Hz; 4 mM  $\text{Ca}^{2+}$ ).

**I-O**, AZ localized omega profiles observed in direct apposition to the postsynaptic density (psd) in stimulated Dock10-Cre;Ai32 slices (100 x 5 ms LPs at 20 Hz; 2 mM  $\text{Ca}^{2+}$ ).

Abbrev.: d, dendrite; mfb, mossy fiber bouton; sp, complex spine; psd, postsynaptic density. Scale bars: **A**, 1  $\mu\text{m}$ ; **B-O**, 100 nm.

See also Figure 6.
